# Supplementary material for: Trabid patient mutations impede the axonal trafficking of adenomatous polyposis coli to disrupt neurite growth
Source: eLife journal article supplement (doi:10.7554/elife.90796), 2023-10-11
Supplement: fig1-figsupp2-data1 [file elife-90796-fig1-figsupp2-data1-v1.zip]

Figure 1-figure supplement 2-source data 1

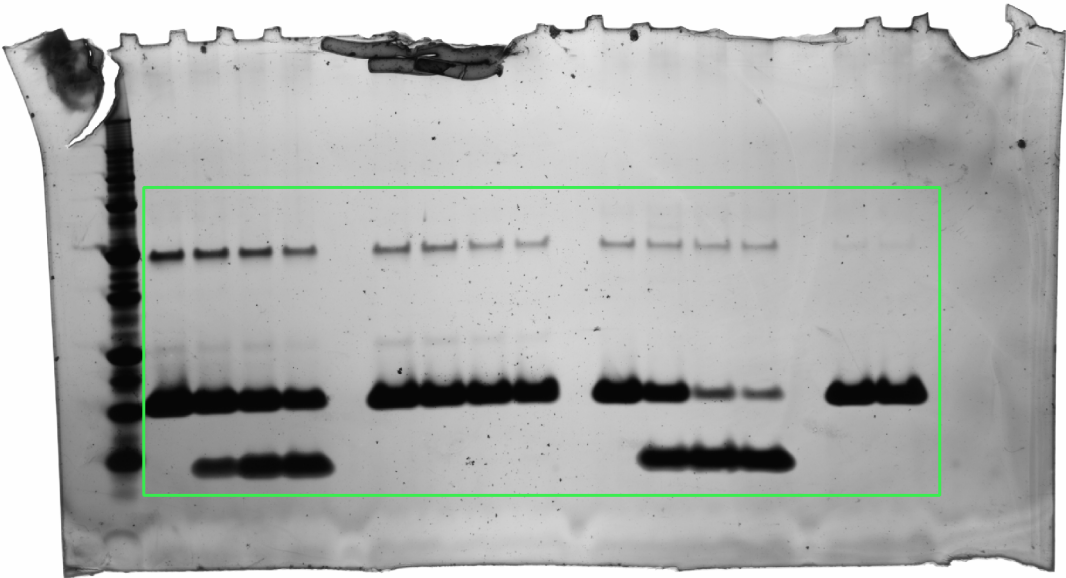

Uncropped silver-stained gel of Lys29 di-Ub DUB assasy.  
The region in the green box is presented as Figure 1-figure supplement 2.
